# Supplementary material
Source: Springer Nature journal article supplement (https://www.springermedizin.de/resource/supplementary/12891_2007_379_MOESM4_ESM.pdf/9510924)

Sensitivity

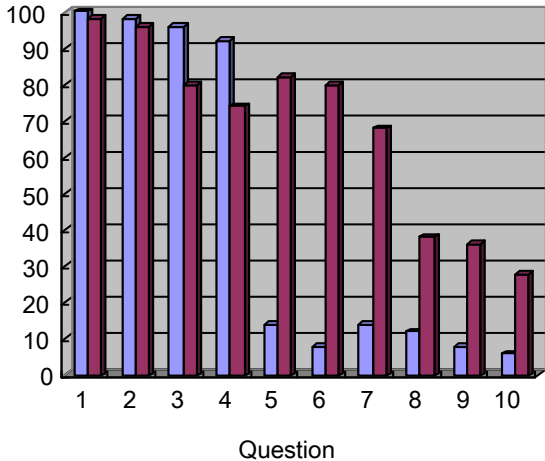

radicular type  
cauda equina type

Supplement: MOESM4 [file 9510924]
